# Supplementary material for: Imidazolium-based ionic liquids as stabilizers for electrode modification with water-soluble porphyrin
Source: Royal Society of Chemistry journal article supplement (doi:10.1039/c8nj05455j), 2019-01-01
Supplement: c8nj05455j1.pdf [file c8nj05455j1.pdf]

**IMIDAZOLIUM BASED IONIC LIQUID AS STABILIZER FOR ELECTRODE  
 MODIFICATION WITH A WATER-SOLUBLE PORPHYRIN**

*Macarena García<sup>a,\*</sup>, Jessica Honores<sup>b</sup>, Freddy Celis<sup>a</sup>, Francesca Fuenzalida<sup>c</sup>,*

*Roxana Arce<sup>d</sup>, María J. Aguirre<sup>c</sup> and Andrés Aracena<sup>e</sup>*

Journal: New Journal of Chemistry

Table S1. Experimental and theoretical Raman frequencies ( $\text{cm}^{-1}$ ) of anion (ILs) and anion (ILs) – TMPyP system.

| <b>Experimental<br/>Raman<br/>NTf<sub>2</sub><sup>-</sup><br/>(cm<sup>-1</sup>)</b> | <b>Experimental<br/>Raman<br/>NTf<sub>2</sub><sup>-</sup> – TMPyP<br/>(cm<sup>-1</sup>)</b> | <b>Theoretical<br/>Raman<br/>NTf<sub>2</sub><sup>-</sup><br/>(cm<sup>-1</sup>)</b> | <b>Theoretical<br/>Raman<br/>NTf<sub>2</sub><sup>-</sup> – TMPyP<br/>(cm<sup>-1</sup>)</b> | <b>Assignment</b>        |
|-------------------------------------------------------------------------------------|---------------------------------------------------------------------------------------------|------------------------------------------------------------------------------------|--------------------------------------------------------------------------------------------|--------------------------|
| 283                                                                                 | 289                                                                                         | 287                                                                                | 273                                                                                        | FCSO skeletal def.       |
| 451                                                                                 | 437                                                                                         | 452                                                                                | 491                                                                                        | OSNS skeletal def.       |
| 1242                                                                                | 1242                                                                                        | 1256                                                                               | 1258                                                                                       | (S)-CF <sub>3</sub> def. |

  

| <b>Experimental<br/>Raman<br/>PF<sub>6</sub><sup>-</sup><br/>(cm<sup>-1</sup>)</b> | <b>Experimental<br/>Raman<br/>PF<sub>6</sub><sup>-</sup> – TMPyP<br/>(cm<sup>-1</sup>)</b> | <b>Theoretical<br/>Raman<br/>PF<sub>6</sub><sup>-</sup><br/>(cm<sup>-1</sup>)</b> | <b>Theoretical<br/>Raman<br/>PF<sub>6</sub><sup>-</sup> – TMPyP<br/>(cm<sup>-1</sup>)</b> | <b>Assignment</b>                 |
|------------------------------------------------------------------------------------|--------------------------------------------------------------------------------------------|-----------------------------------------------------------------------------------|-------------------------------------------------------------------------------------------|-----------------------------------|
| 468                                                                                | 468                                                                                        | 449                                                                               | 446                                                                                       | PF <sub>6</sub> <sup>-</sup> def. |
| 823                                                                                | 822                                                                                        | 894                                                                               | 893                                                                                       | PF <sub>6</sub> <sup>-</sup> def. |

\*def.: deformation
